# Supplementary material for: Plasmonic Nanocomposites of ZnO-Ag Produced by Laser Ablation and Their Photocatalytic Destruction of Rhodamine, Tetracycline and Phenol
Source: MDPI journal article supplement (doi:10.3390/ma17020527), 2024-01-22
Supplement: s1 [file s1]

Article

# Plasmonic nanocomposites of ZnO-Ag produced by laser ablation and their photocatalytic destruction of rhodamine, tetracycline and phenol

Elena D. Fakhrutdinova <sup>1,\*</sup>, Anastasia V. Volokitina <sup>1,2</sup>, Sergei A. Kulinich <sup>2,\*</sup>, Daria A. Goncharova <sup>1</sup>, Tamara S. Kharlamova <sup>3</sup> and Valery A. Svetlichnyi <sup>1</sup>

<sup>1</sup> Laboratory of Advanced Materials and Technology, Tomsk State University, Tomsk 634050, Russia;

<sup>2</sup> Research Institute of Science & Technology, Tokai University, Hiratsuka, Kanagawa 259-1292, Japan

<sup>3</sup> Laboratory of Catalytic Research, Tomsk State University, Tomsk 634050, Russia

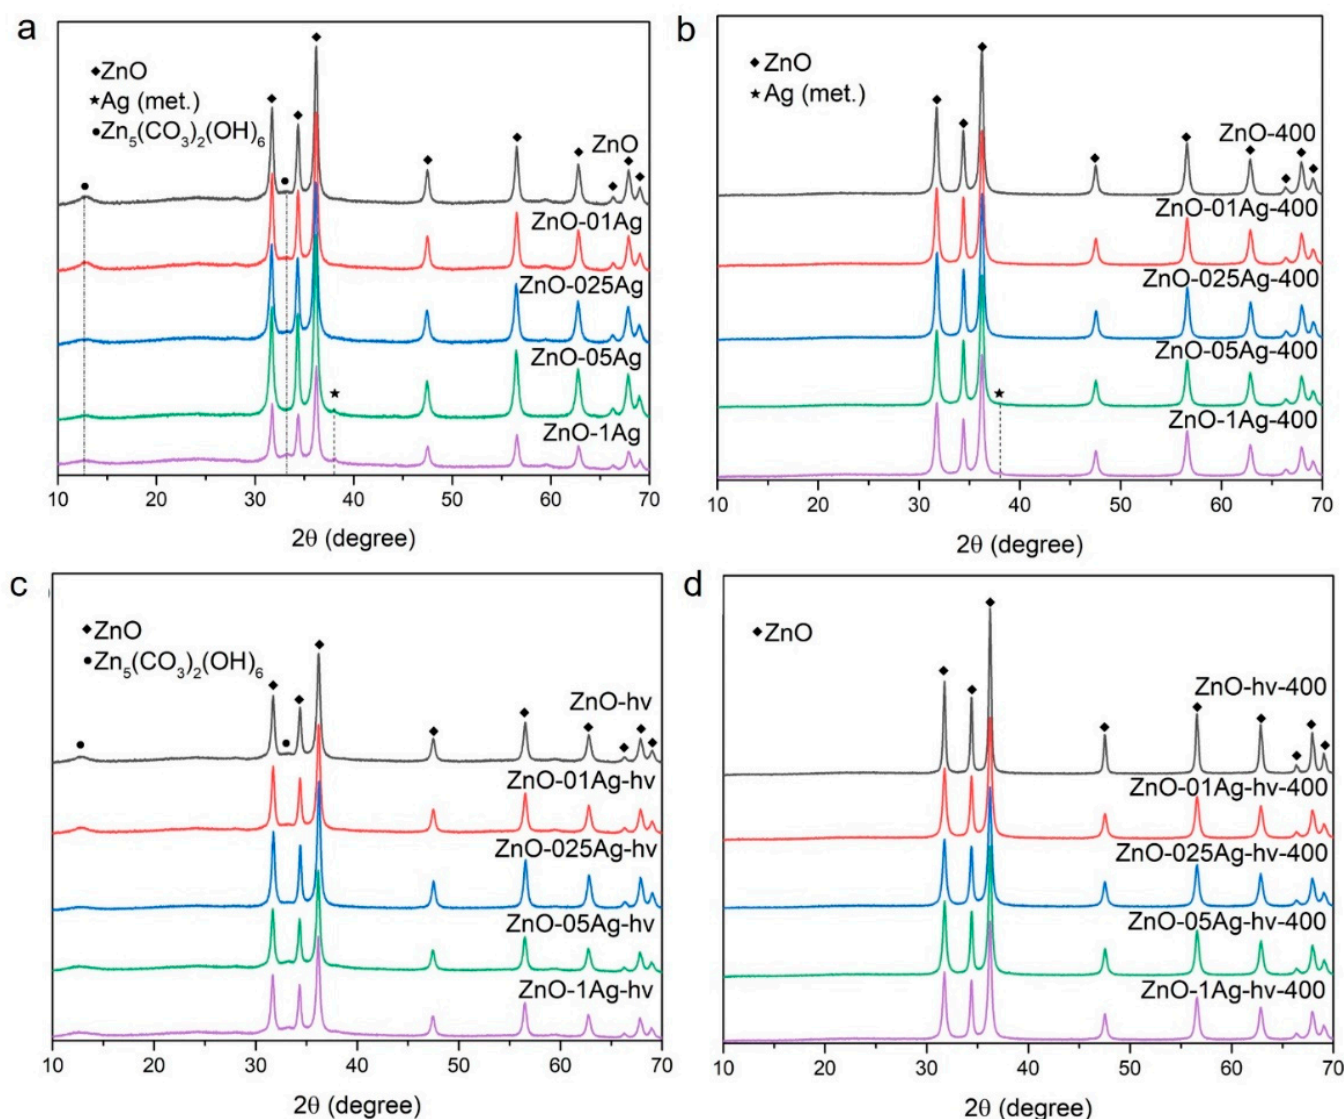

**Figure S1.** X-ray diffraction patterns of a series of samples: ZnO-Ag (a); ZnO-Ag-400 (b); ZnO-Ag-hv (c); ZnO-Ag-hv-400 (d).

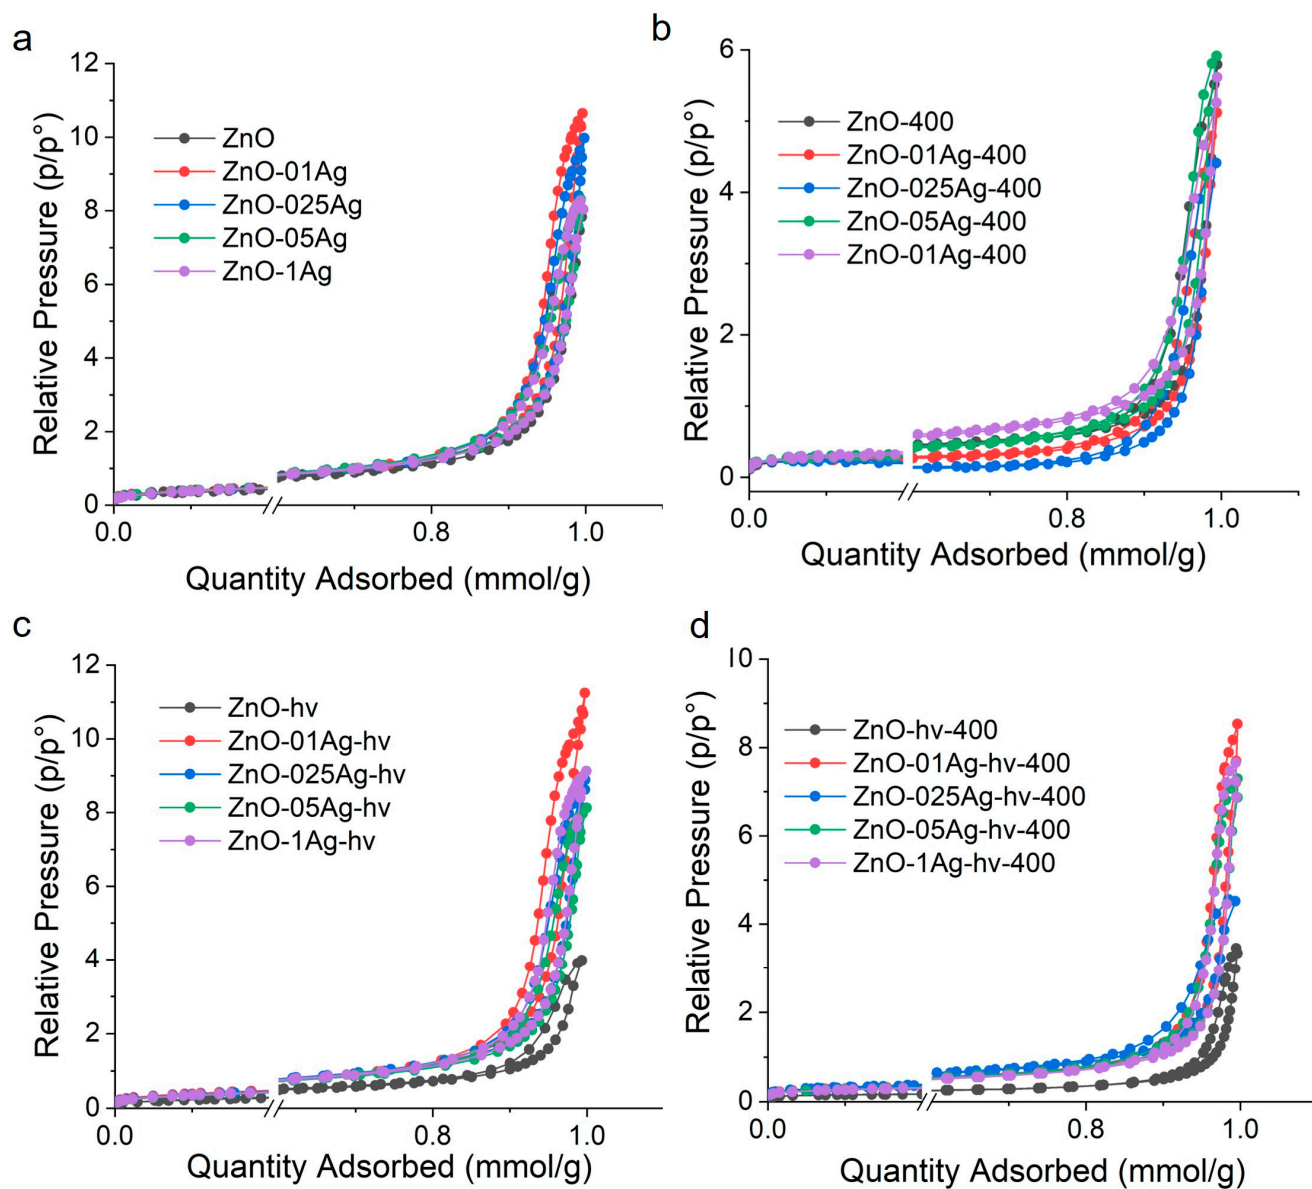

**Figure S2.** Nitrogen adsorption-desorption isotherms for BET of samples: ZnO-Ag (a); ZnO-Ag-400 (b); ZnO-Ag-hv (c); ZnO-Ag-hv-400 (d).

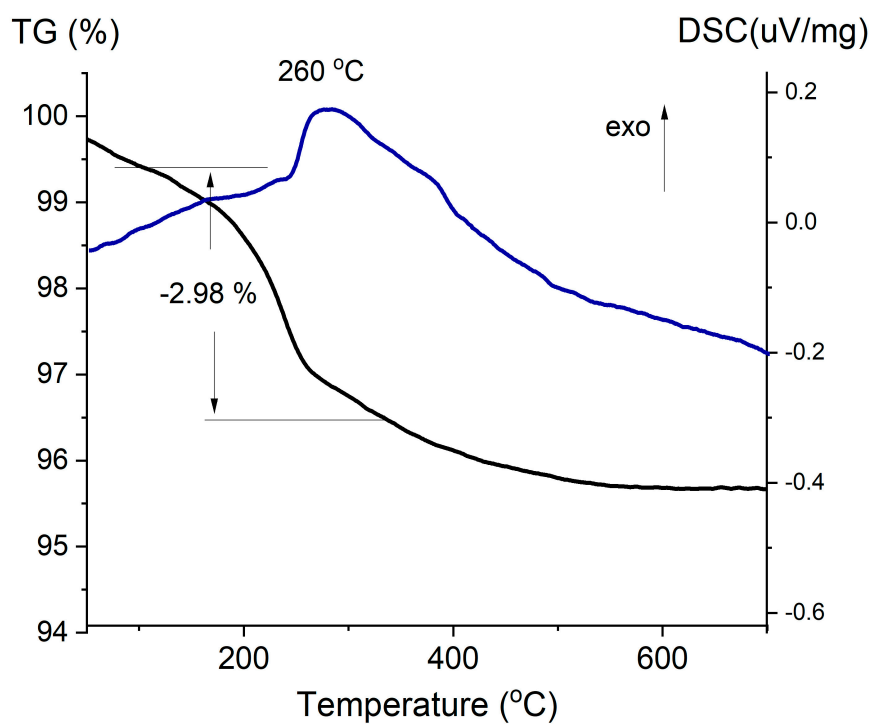

**Figure S3.** TG-DSC (thermogravimetry-differential scanning calorimetry) curve of sample ZnO

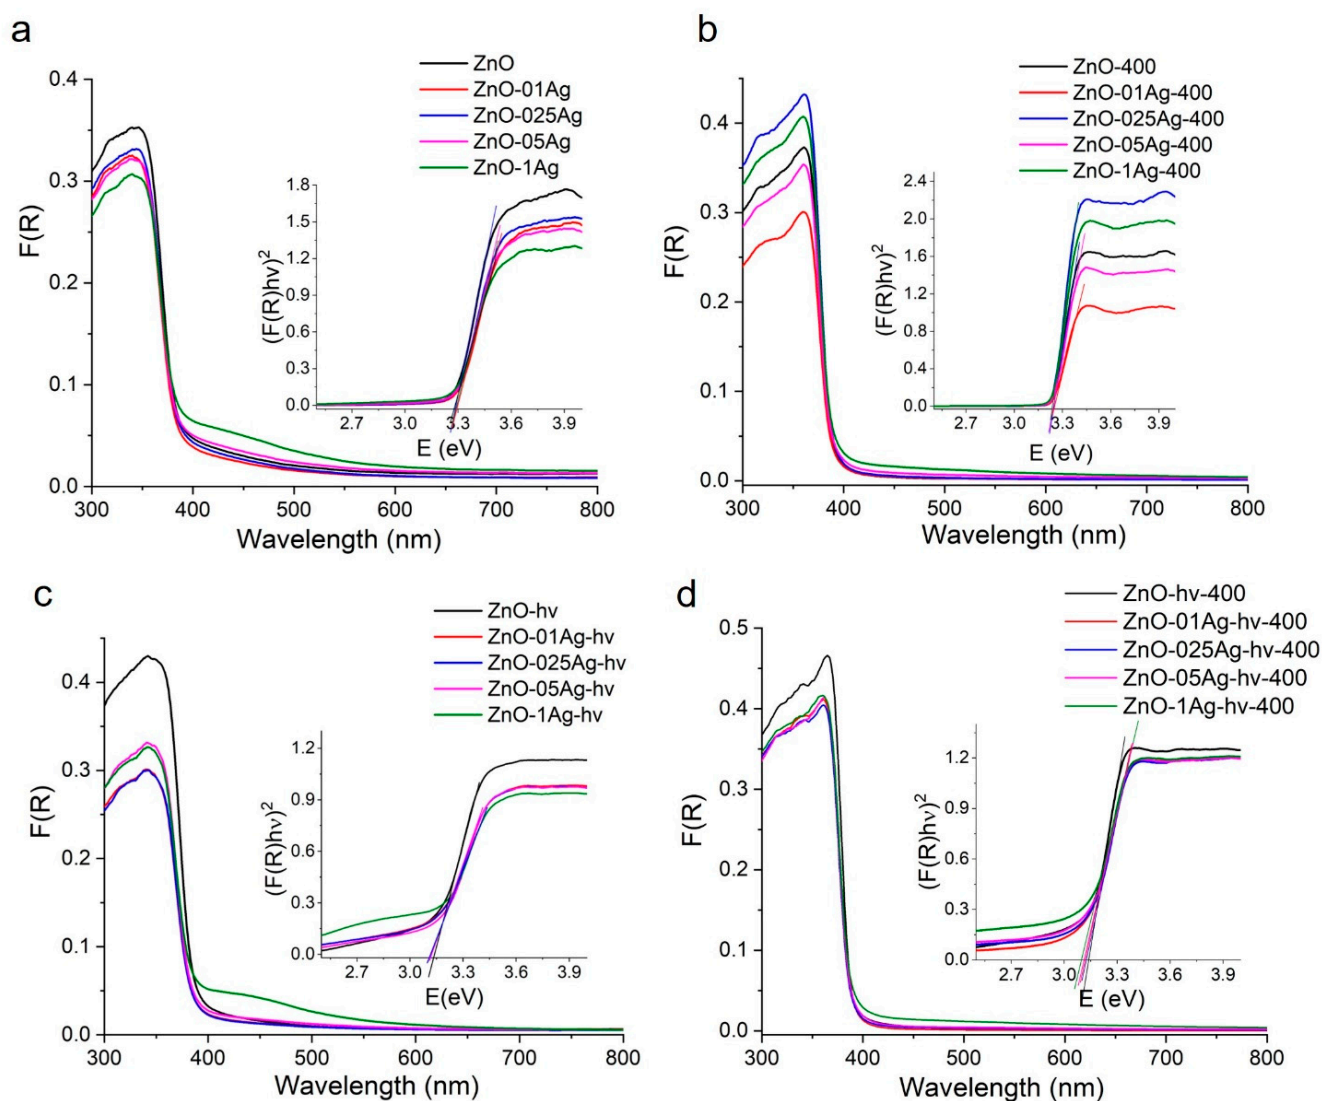

**Figure S4.** Diffuse reflectance spectra of a series of samples: ZnO-Ag (a); ZnO-Ag-400 (b); ZnO-Ag-hv (c); ZnO-Ag-hv-400 (d); and estimation of the band gap using the Tauc method (see inserts).

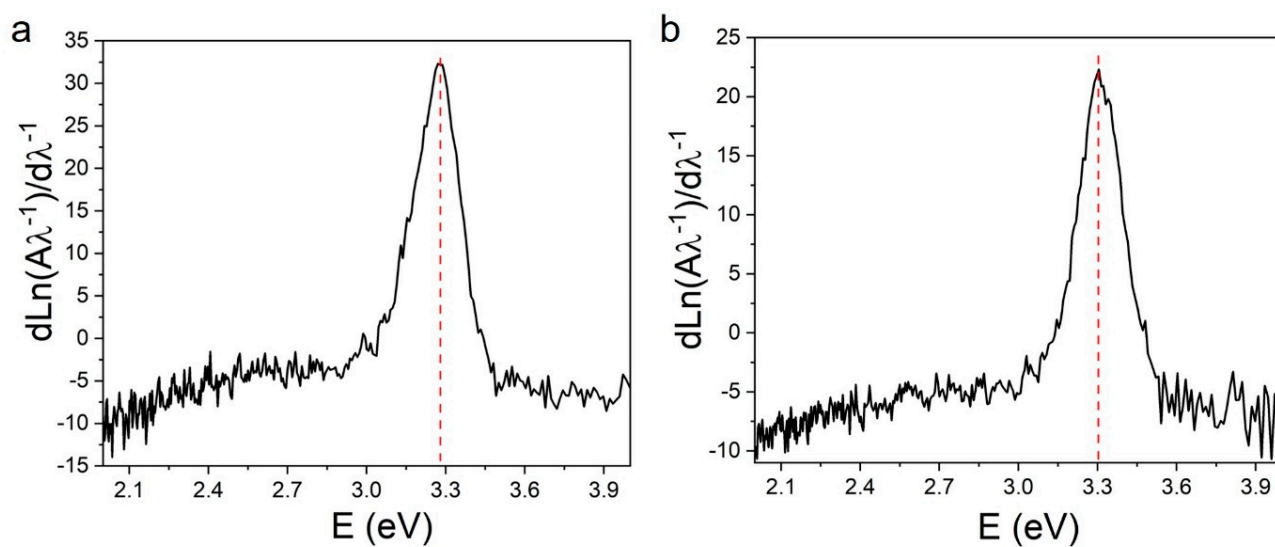

**Figure S5.** Example spectra for calculating  $E_g$  using the DASF method for samples ZnO (a) and ZnO-hv (b).

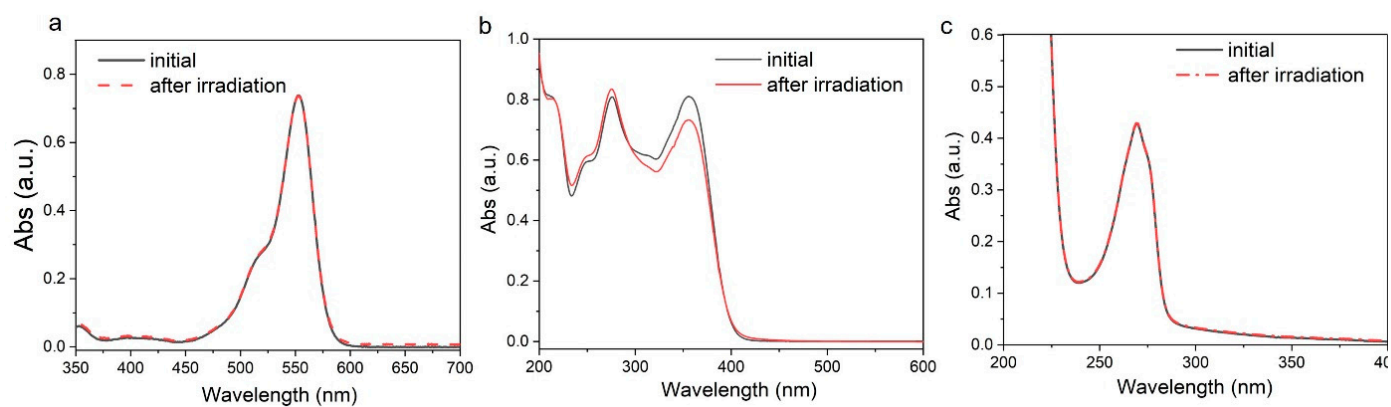

**Figure S6.** Absorption spectra of Rh B (a), TC (b) and Phen (c) before and after 480 min of irradiation with LED with  $\lambda = 375$  nm.

**Table S1.** Reaction rate constants for the decomposition of RhB under irradiation with LED ( $\lambda = 375$  nm).

| Ag content, % | Reaction rate, min <sup>-1</sup> |           |        |                |
|---------------|----------------------------------|-----------|--------|----------------|
|               | initial                          | annealing | ALT    | ALT+ annealing |
| 0             | 0.0017                           | 0.0059    | 0.004  | 0.0051         |
| 0.1           | 0.0056                           | 0.0115    | 0.0194 | 0.0080         |
| 0.25          | 0.0146                           | 0.0122    | 0.0195 | 0.0108         |
| 0.5           | 0.0151                           | 0.0123    | 0.0197 | 0.0108         |
| 1.0           | 0.0181                           | 0.0209    | 0.0206 | 0.0121         |

**Table S2.** Reaction rate constants for the decomposition of TC under irradiation with LED ( $\lambda = 375$  nm).

| Ag content, % | Reaction rate, min <sup>-1</sup> |           |        |                |
|---------------|----------------------------------|-----------|--------|----------------|
|               | initial                          | annealing | ALT    | ALT+ annealing |
| 0             | 0.0231                           | 0.0294    | 0.0191 | 0.0312         |
| 0.1           | 0.0387                           | 0.0333    | 0.0341 | 0.0356         |
| 0.25          | 0.0383                           | 0.0358    | 0.0369 | 0.0392         |
| 0.5           | 0.0412                           | 0.0362    | 0.0377 | 0.0449         |
| 1.0           | 0.0482                           | 0.0589    | 0.0435 | 0.0558         |

**Table S3.** Reaction rate constants for the decomposition of Phen under irradiation with LED ( $\lambda = 375$  nm).

| Ag content, % | Reaction rate, min <sup>-1</sup> |           |        |                |
|---------------|----------------------------------|-----------|--------|----------------|
|               | initial                          | annealing | ALT    | ALT+ annealing |
| 0             | 0.0004                           | 0.0007    | 0.0004 | 0.0018         |
| 0.1           | 0.0008                           | 0.0016    | 0.0011 | 0.0019         |
| 0.25          | 0.0011                           | 0.0019    | 0.0012 | 0.0024         |
| 0.5           | 0.0013                           | 0.0019    | 0.0012 | 0.0026         |
| 1.0           | 0.0013                           | 0.0019    | 0.0011 | 0.0019         |
